# Supplementary material for: Allelic Variation in GmPAP14 Alters Gene Expression to Affect Acid Phosphatase Activity in Soybean
Source: MDPI journal article supplement (doi:10.3390/ijms24065398), 2023-03-11
Supplement: s1 [file s1]

*P-GmPAP14Z* CTGAGGAAAAGACTACAGTATACTCTCTCTTTTTTGTGCGTAAATATATAGTATAGTACTCTTTTCAATTAATATGTACTCTA 80  
*P-GmPAP14N* CTGAGGAAAAGACTACAGTATACTCTCTCTTTTTTGTGCGTAAATATATAGTATAGTACTCTTTTCAATTAATATGTACTCTA 80  
*P-GmPAP14Z* ATAAATATTTGTTGATGCGTAGTCGATGGTTTACAACCTAGTATCAAATAATTAGTAGTTGCGACTGATGGTCGATAACCAA 160  
*P-GmPAP14N* ATAAATATTTGTTGATGCGTAGTCGATGGTTTACAACCTAGTATCAAATAATTAGTAGTTGCGACTGATGGTCGATAACCAA 160  
*P-GmPAP14Z* CATCTCAATTGATATCCGAGACTTAATAGTTGAGAATAGTGATGCCGATGGTCAACCTTAAATTAGTGGGATCAAGTTA 240  
*P-GmPAP14N* CATCTCAATTGATATCCGAGACTTAATAGTTGAGAATAGTGATGCCGATGGTCAACCTTAAATTAGTGGGATCAAGTTA 240  
*P-GmPAP14Z* AGATCCATTAAAGTTTAAATTGATAATTCAAGGGACCAAAAATCATATGAACTCATGAGACATAAGTTAGAACAAAACAAC 320  
*P-GmPAP14N* AGATCCATTAAAGTTTAAATTGATAATTCAAGGGACCAAAAATCATATGAACTCATGAGACATAAGTTAGAACAAAACAAC 320  
*P-GmPAP14Z* CGATGGTAGAGCCGAGCGACATTTTCGGTTATGTTGGGCAAAAGTATCTATAAAGTTATTTGAAAAATGTAAGTAATAAAC 400  
*P-GmPAP14N* CGATGGTAGAGCCGAGCGACATTTTCGGTTATGTTGGGCAAAAGTATCTATAAAGTTATTTGAAAAATGTAAGTAATAAAC 400  
*P-GmPAP14Z* GATTGCAATGTAAGTAGATTTTAAAGGGACAAATCTTTTTCTGTAAAAAGAGGGATGAATCTTTATCAAATTATTTAAT 478  
*P-GmPAP14N* GATTGCAATGTAAGTAGATTTTAAAGGGACAAATCTTTTTCTGTAAAAAGAGGGATGAATCTTTATCAAATTATTTAAT 480  
*P-GmPAP14Z* GCCTTACCATCAACTTCTCAATTTAATGCCTTGCCATCGATTTCTTAAATTAATAATTGGCATGCATTTTGTTCCTCAA 558  
*P-GmPAP14N* GCCTTACCATCAACTTCTCAATTTAATGCCTTGCCATCGATTTCTTAAATTAATAATTGGCATGCATTTTGTTCCTCAA 560  
*P-GmPAP14Z* AAAATTCACAACATTTATATTTAAAAAAAAGTATTCGCATGTCAATTATTAATTTGAGAATTTAAAGATAAGGTGCACCC 638  
*P-GmPAP14N* AAAATTCACAACATTTATATTTAAAAAAAAGTATTCGCATGTCAATTATTAATTTGAGAATTTAAAGATAAGGTGCACCC 640  
*P-GmPAP14Z* AACTTTATTAATCTCTCCTTTTATATGTTCTTAAGTTATAGTATTTAGAAAATATTAATGTAACGATTTTTTTTCCAT 718  
*P-GmPAP14N* AACTTTATTAATCTCTCCTTTTATATGTTCTTAAGTTATATTTATTTAGAAAATATTAATGTAACGATTTTTTTTCCAT 719  
*P-GmPAP14Z* TGGGGTTAAAAAATGCAAAATATGTAGCCGATCTTATAAAATAATTATCTAGTGAAATAATTTTATTTAAGATGGATA 798  
*P-GmPAP14N* TGGGGTTAAAAAATGCAAAATATGTAGCCGATCTTATAAAATAATTATCTAGTGAAATAATTTTATTTAAGATGGATA 799  
*P-GmPAP14Z* AGATTATTATAGGACCGATTAAAAATAAAGAATCCAATCCACCTGTTGATTGATGGTTGATGATAAGAGAGAA 871  
*P-GmPAP14N* AGATTATTATAGGACCGATTAAAAATAAAGAATCCAATCCACCTGTTGATTGATGGTTGATGATAAGAGAGAA 879  
*P-GmPAP14Z* GTTAATTAAGAGTAAACAAAGGGTATATCATATCATAACCTTTGTAACCTTTATGAAATAACACTAGCCTATAATTTC 951  
*P-GmPAP14N* GTTAATTAAGAGTAAACAAAGGGTATATCATATCATAACCTTTGTAACCTTTATGAAATAACACTAGCCTATAATTTC 959  
*P-GmPAP14Z* TTTGATTATGACCTTTTCTTTTCAAAATGACATAGAAAAATGTAATCAATGATCACAATAAAAAAGATTCCAATTTGTT 1031  
*P-GmPAP14N* TTTGATTATGACCTTTTCTTTTCAAAATGACATAGAAAAATGTAATCAATGATCACAATAAAAAAGATTCCAATTTGTT 1039  
*P-GmPAP14Z* TGACGCCATATATAGAAAAGTGTGTCTCCAACCTTAACTGGGGCTATCCGGCCCATTCGGCAACTTGTATGGTCTGAA 1111  
*P-GmPAP14N* TGACGCCATATATAGAAAAGTGTGTCTCCAACCTTAACTGGGGCTATCCGGCCCATTCGGCAACTTGTATGGTCTGAA 1119  
*P-GmPAP14Z* CTGAACGCCACTCCTCATATGCTGCAATTCCAATTGATTCAGACCTGTGCATTCAAAGTCAACTTTGTAATTTGTAACA 1191  
*P-GmPAP14N* CTGAACGCCACTCCTCATATGCTGCAATTCCAATTGATTCAGACCTGTGCATTCAAAGTCAACTTTGTAATTTGTAACA 1199  
*P-GmPAP14Z* AAAATCTTGGCTGAACAACCTCTTTTCTTATGAGATGGAAGAAAAATAAATAAGTGAGAGAGATACATGATGTGACGT 1271  
*P-GmPAP14N* AAAATCTTGGCTGAACAACCTCTTTTCTTATGAGATGGAAGAAAAATAAATAAGTGAGAGAGATACATGATGTGACGT 1279  
*P-GmPAP14Z* GAATCAATATTATATTATAGTTTATACCTTTATCATTTATTTTATCAGTTTACCGCTTCAACTTAACTGAAGCCATTTCATT 1351  
*P-GmPAP14N* GAATCAATATTATATTATAGTTTATACCTTTATCATTTATTTTATCAGTTTACCGCTTCAACTTAACTGAAGCCATTTCATT 1359  
*P-GmPAP14Z* GGTTTGTTTCTCTTAGTCTTCGCGGTTAACGTAAACTGAACCGTGTTTTTGTCTTTCGAAGAAAACGATGGTAAATGTTG 1431  
*P-GmPAP14N* GGTTTGTTTCTCTTAGTCTTCGCGGTTAACGTAAACTGAACCGTGTTTTTGTCTTTCGAAGAAAACGATGGTAAATGTTG 1439  
*P-GmPAP14Z* CTTGCTTCACGGACCTCTGTCTTGTGACCTCTAATGTGAATATTCCTCATCATATGCCATTCCATTTCATTAAACAGTT 1511  
*P-GmPAP14N* CTTGCTTCACGGACCTCTGTCTTGTGACCTCTAATGTGAATATTCCTCATCATATGCCATTCCATTTCATTAAACAGTT 1519  
*P-GmPAP14Z* AATGCACCCTTATCAATTTACCTTATACCAGTACTTATCATTTATAAAGATCAGAGAGTGCAATGGAATAATAAATACGCG 1591  
*P-GmPAP14N* AATGCACCCTTATCAATTTACCTTATACCAGTACTTATCATTTATAAAGATCAGAGAGTGCAATGGAATAATAAATACGCG 1599  
*P-GmPAP14Z* AGTGTGCGACCTGGATCACTAGAAATCACGGGTTTTGAGCAAA 1635  
*P-GmPAP14N* AGTGTGCGACCTGGATCACTAGAAATCACGGGTTTTGAGCAAA 1643

Figure S1 : Sequence alignment of *P-GmPAP14Z* and *P-GmPAP14N*.

*G-GmPAP14Z* ATGGGTGTTGTGGAGGGTCTCTTAGCATTGGCTTTGGTTCTGAGTGTTCGCTGGTGTGCAATGGAGGCTCAAGCAGCCCCCTCATTAGGAAAGT 95  
*G-GmPAP14N* ATGGGTGTTGTGGAGGGTCTCTTAGCATTGGCTTTGGTTCTGAGTGTTCGCTGGTGTGCAATGGAGGCTCAAGCAGCCCCCTCATTAGGAAAGT 95  
*G-GmPAP14Z* TGAGAAGACAGTGGATATGCCACTTGACAGCATGTCTTTGCTGTTCCTCTGGTTATAATGCTCCCCAGCAGGTACTACCTACCCCTTCTCTTC 190  
*G-GmPAP14N* TGAGAAGACAGTGGATATGCCACTTGACAGCATGTCTTTGCTGTTCCTCTGGTTATAATGCTCCCCAGCAGGTACTACCTACCCCTTCTCTTC 190  
*G-GmPAP14Z* TTCTCTTTACTATCTTCATTTTAAATCTGGTTTCTGTGTAGAGTAGAGAGGGAAGTGGTTAATGATGCTTTGCTGCCCCAGTGAATCAAGTTCT 285  
*G-GmPAP14N* TTCTCTTTACTATCTTCATTTTAAATCTGGTTTCTGTGTAGAGTAGAGAGGGAAGTGGTTAATGATGCTTTGCTGCCCCAGTGAATCAAGTTCT 285  
*G-GmPAP14Z* GTACTTGCCATTAACCAATGAGTGAATTTAGATGCAGTTTATGCTTGTGTGCCATTCTCCAATTCAAATTAGAGTTTCACTTTGATAAATTGA 380  
*G-GmPAP14N* GTACTTGCCATTAACCAATGAGTGAATTTAGATGCAGTTTATGCTTGTGTGCCATTCTCCAATTCAAATTAGAGTTTCACTTTGATAAATTGA 380  
*G-GmPAP14Z* GTGATGTTTGATAGAAATCTTTATTATCATCATATTTATCCAAGTGAATTTCACTTCTGATACCAGCATAGCACCAAAACACCAATAGAGCTA 475  
*G-GmPAP14N* GTGATGTTTGATAGAAATCTTTATTATCATCATATTTATCCAAGTGAATTTCACTTCTGATACCAGCATAGCACCAAAACACCAATAGAGCTA 475  
*G-GmPAP14Z* CATCTATGCTTTGTGCTTAACCAATTCCTTTCTAATTCAACATTTTACATTTTGCACCCCTTTGGGATTTTTCTTTCTTTGATTGTAATCA 570  
*G-GmPAP14N* CATCTATGCTTTGTGCTTAACCAATTCCTTTCTAATTCAACATTTTACATTTTGCACCCCTTTGGGATTTTTCTTTCTTTGATTGTAATCA 570  
*G-GmPAP14Z* ATGGCTCCTATGCATTAAAGGTCATATAACGCAAGGTGACCTTGTGGGAAAGCAGTGATCGTGCATGGGTGACAGTGGATGAACCGGGGTCGA 665  
*G-GmPAP14N* ATGGCTCCTATGCATTAAAGGTCATATAACGCAAGGTGACCTTGTGGGAAAGCAGTGATCGTGCATGGGTGACAGTGGATGAACCGGGGTCGA 665  
*G-GmPAP14Z* GCGAAGTGCACTTACTGGAGTGAGAACAGTGACAGAAGAAAGATGCCGAGGAAAACCTTGTTACTTATAGGTTCTCAATTACCATCTGGTTTT 760  
*G-GmPAP14N* GCGAAGTGCACTTACTGGAGTGAGAACAGTGACAGAAGAAAGATGCCGAGGAAAACCTTGTTACTTATAGGTTCTCAATTACCATCTGGTTTT 760  
*G-GmPAP14Z* ATTCAACACACCACCATCAGAAATTTGGAGGTAATTTCTTTTCCATTACTTTGGTTTATGCTGTTTATTGTCCAGATAGATGCCAGCTAGAA 855  
*G-GmPAP14N* ATTCAACACACCACCATCAGAAATTTGGAGGTAATTTCTTTTCCATTACTTTGGTTTATGCTGTTTATTGTCCAGATAGATGCCAGCTAGAA 855  
*G-GmPAP14Z* TCTTGGAAGAAAAAAGGAGCATTTTGGTTTGTGATCAATTTGTGATGCTGCTCTTTTGGGGCAGTACAAACCAAACTACTACTAT 950  
*G-GmPAP14N* TCTTGGAAGAAAAAAGGAGCATTTTGGTTTGTGATCAATTTGTGATGCTGCTCTTTTGGGGCAGTACAAACCAAACTACTACTAT 950  
*G-GmPAP14Z* GAGGTTGGACTTGGGAACACACACGGCAATTTGGTTTGTGACTCCTCCTGAAATGGTCCGATGTGCCATACATTTGGTCTCATAGGTAA 1045  
*G-GmPAP14N* GAGGTTGGACTTGGGAACACACACGGCAATTTGGTTTGTGACTCCTCCTGAAATGGTCCGATGTGCCATACATTTGGTCTCATAGGTAA 1045  
*G-GmPAP14Z* GTGTACTATTCTATCAAAGTAATTCGGAGTCACTGAGGGGGTCTAGCTCAATGTCTTTATCACCTTGAATTTGTGAGCATTATCATTAATTG 1140  
*G-GmPAP14N* GTGTACTATTCTATCAAAGTAATTCGGAGTCACTGAGGGGGTCTAGCTCAATGTCTTTATCACCTTGAATTTGTGAGCATTATCATTAATTG 1140  
*G-GmPAP14Z* GGAAGGAAAAATGCTATATGTTTGTGTACCAATAGGCCATTTATGTTTCTGTAACTGGTTGTCTTTATTGTGAGGGGATCTTGGTCAGAGTTT 1235  
*G-GmPAP14N* GGAAGGAAAAATGCTATATGTTTGTGTACCAATAGGCCATTTATGTTTCTGTAACTGGTTGTCTTTATTGTGAGGGGATCTTGGTCAGAGTTT 1235  
*G-GmPAP14Z* TGATTCAAATAAACTCTTTCTCACTATGAATTGAACCAAGAAAGGACAACTGTACTATTGTTGAGAGCTCTCTTATGCGGATAACTACC 1330  
*G-GmPAP14N* TGATTCAAATAAACTCTTTCTCACTATGAATTGAACCAAGAAAGGACAACTGTACTATTGTTGAGAGCTCTCTTATGCGGATAACTACC 1330  
*G-GmPAP14Z* CAAATCATGATAACATTAGGTGGGATTTCTGGGGAAGGTTTACAGAAAGGAGTGTGCTTATCAACCATGGATATGGACTGCAGGAAACCATGAA 1425  
*G-GmPAP14N* CAAATCATGATAACATTAGGTGGGATTTCTGGGGAAGGTTTACAGAAAGGAGTGTGCTTATCAACCATGGATATGGACTGCAGGAAACCATGAA 1425  
*G-GmPAP14Z* ATTGATTTTGTCTCCAGAAATGTAAGCTTCTCATAAGAAATGACTTTATTTTGTTTTAACTATCTGAGAAACTTTTCATTCTTTATTTTTCAA 1520  
*G-GmPAP14N* ATTGATTTTGTCTCCAGAAATGTAAGCTTCTCATAAGAAATGACTTTATTTTGTTTTAACTATCTGAGAAACTTTTCATTCTTTATTTTTCAA 1520  
*G-GmPAP14Z* CCATAAATTTCTAACCTCGTGAATGCATTTTCTAGTCCAAATTAGTAAGAAGTAAGTTTTTAAACATGGATCACTGCTTTGTTGTAGGGTGAAA 1615  
*G-GmPAP14N* CCATAAATTTCTAACCTCGTGAATGCATTTTCTAGTCCAAATTAGTAAGAAGTAAGTTTTTAAACATGGATCACTGCTTTGTTGTAGGGTGAAA 1615  
*G-GmPAP14Z* CTGTACCTTTCAAGCCTTATACCCACCGTTACCATCTTTCTTATAAAGCATCTCAAAGTACTTCAACCTTCTCGTATTCATCAAGAGACCTTCA 1710  
*G-GmPAP14N* CTGTACCTTTCAAGCCTTATACCCACCGTTACCATCTTTCTTATAAAGCATCTCAAAGTACTTCAACCTTCTCGTATTCATCAAGAGACCTTCA 1710  
*G-GmPAP14Z* GCACACATCATTTGTTTGGCCTCATATTACGCGTATGGTAATGCTAGATGCTTTTGCATGATACATATTTATGTAGAGAGCACTGGCTGATTTCT 1805  
*G-GmPAP14N* GCACACATCATTTGTTTGGCCTCATATTACGCGTATGGTAATGCTAGATGCTTTTGCATGATACATATTTATGTAGAGAGCACTGGCTGATTTCT 1805  
*G-GmPAP14Z* ATGATTTGAGCAAAACAGGATCTGTTTGTAAATTTACCTTAGTGATTACCTATATGACTTGGAAAAGATCAAATTTTACTGAATAATTTC 1900  
*G-GmPAP14N* ATGATTTGAGCAAAACAGGATCTGTTTGTAAATTTACCTTAGTGATTACCTATATGACTTGGAAAAGATCAAATTTTACTGAATAATTTC 1900  
*G-GmPAP14Z* GTTCTTAGATCTATATATATCTATCTGTATGTATGTATTTCCATAAATGTGGAATGTTAATATCTCAGACATGATGCTGCTGCTGCT 1975  
*G-GmPAP14N* GTTCTTAGATCTATATATATCTATCTGTATGTATGTATTTCCATAAATGTGGAATGTTAATATCTCAGACATGATGCTGCTGCTGCTGCT 1995  
*G-GmPAP14Z* TAACTGCTTGAACCAATCAACACTTGCCTTAAATGATCTGTGCGTGTGCTGTGCTAACATGTAAAGTTAAATGCAATTCGTCACTGCTGCTGTTAC 2054  
*G-GmPAP14N* TAACTGCTTGAACCAATCAACACTTGCCTTAAATGATCTGTGCGTGTGCTGTGCTAACATGTAAAGTTAAATGCAATTCGTCACTGCTGCTGTTAC 2090  
*G-GmPAP14Z* TACTTGGATTAATGACACATAATCTGATATCATTTGTTTTAAAGTGGTATCTCTTTGTTTACAATAATCTTCCATTTTCTCAGGAAAAATAT 2149  
*G-GmPAP14N* TACTTGGATTAATGACACATAATCTGATATCATTTGTTTTAAAGTGGTATCTCTTTGTTTACAATAATCTTCCATTTTCTCAGGAAAAATAT 2185  
*G-GmPAP14Z* ACACCACAATATAAATGGCTTGAAGAGGAGCTACCGAAAGTTAACAGGACAGAGACTCCTTGGTTGATTGTTCTCATGCATTCACCTTGGTATA 2244  
*G-GmPAP14N* ACACCACAATATAAATGGCTTGAAGAGGAGCTACCGAAAGTTAACAGGACAGAGACTCCTTGGTTGATTGTTCTCATGCATTCACCTTGGTATA 2280  
*G-GmPAP14Z* TAGCTACAATTTACATATATGAAGGGGAAACATGAGAGTCTGTATGAGCCCTGGTTTGTGCAGTACAAGGTTGATGTTGTGTTTCTGCTGTC 2339  
*G-GmPAP14N* TAGCTACAATTTACATATATGAAGGGGAAACATGAGAGTCTGTATGAGCCCTGGTTTGTGCAGTACAAGGTTGATGTTGTGTTTCTGCTGTC 2375  
*G-GmPAP14Z* ATGTTTCATGCTATGAACGATCTGTAAGTGCTAAAACCTTGGTCTCTTAAAGTACTAGCACTTCAATTCCTCATTGAAATTTCTACAACATGTTT 2434  
*G-GmPAP14N* ATGTTTCATGCTATGAACGATCTGTAAGTGCTAAAACCTTGGTCTCTTAAAGTACTAGCACTTCAATTCCTCATTGAAATTTCTACAACATGTTT 2470  
*G-GmPAP14Z* TGAAGCCGCGGATCAATCATGTATCATTAGGCTTGCATTCAAACTGAAAGATAAAGTGAAGTGAAGTGAAGTGAAGTGAAGTGAAGTGAAGTGAAGT 2529  
*G-GmPAP14N* TGAAGCCGCGGATCAATCATGTATCATTAGGCTTGCATTCAAACTGAAAGATAAAGTGAAGTGAAGTGAAGTGAAGTGAAGTGAAGTGAAGTGAAGT 2565  
*G-GmPAP14Z* CTTAAGATGAAATTAAGTACAAAAATTTGACACAAGTAATACACTTCAATAAACTTTTTGAATTTGTATTTGATTGATGAGCTACTATGTATC 2624  
*G-GmPAP14N* CTTAAGATGAAATTAAGTACAAAAATTTGACACAAGTAATACACTTCAATAAACTTTTTGAATTTGTATTTGATTGATGAGCTACTATGTATC 2660  
*G-GmPAP14Z* AGGAGCGTGTTCCTAATTTGCATACAATATTGTAAGTGGCTTTGTGCTCCTGTAAGTGAATAATCAGCTCCTGTATATATAACCATTTGGGGAT 2719  
*G-GmPAP14N* AGGAGCGTGTTCCTAATTTGCATACAATATTGTAAGTGGCTTTGTGCTCCTGTAAGTGAATAATCAGCTCCTGTATATATAACCATTTGGGGAT 2755  
*G-GmPAP14Z* GGAGGAAACCTTGAAGGTTTGAACCAAGTAAGTTCATTATATGTAACATGATGAGTCTTGTCAATTTTATTTTATGCTCTAAGTT 2814  
*G-GmPAP14N* GGAGGAAACCTTGAAGGTTTGAACCAAGTAAGTTCATTATATGTAACATGATGAGTCTTGTCAATTTTATTTTATGCTCTAAGTT 2850  
*G-GmPAP14Z* TGATATAAATGACATGAGTTGACGATGACAGAACACAGCCAAAGTATTTTCAATTCGAGAGGCCAGCTTTGGACATGCCATTTTGGACATA 2909  
*G-GmPAP14N* TGATATAAATGACATGAGTTGACGATGACAGAACACAGCCAAAGTATTTTCAATTCGAGAGGCCAGCTTTGGACATGCCATTTTGGACATA 2945  
*G-GmPAP14Z* CGAACCGAACTGCTCACTATAGCTGGCACCGAAATCAAGATGGAGTTGCTGTGGAGGCCGATTCCTTTGGTTTTTCAACAGATACCTGGCAC 3004  
*G-GmPAP14N* CGAACCGAACTGCTCACTATAGCTGGCACCGAAATCAAGATGGAGTTGCTGTGGAGGCCGATTCCTTTGGTTTTTCAACAGATACCTGGCAC 3040  
*G-GmPAP14Z* CCAGTTGATGATCCACGGCTCATGTTTACATTAA 3040  
*G-GmPAP14N* CCAGTTGATGATCCACGGCTCATGTTTACATTAA 3076

Figure S2 : Sequence alignment of *G-GmPAP14Z* and *G-GmPAP14N*.

*GmPAP14Z* ATGGGTGTTGTGGAGGCTCTCTTAGCATTTGGCTTTGGTTCTGAGTGTTTGCCTGGTGTGCAATGGAGGCTCAAGCAGCCC 80  
*GmPAP14N* ATGGGTGTTGTGGAGGCTCTCTTAGCATTTGGCTTTGGTTCTGAGTGTTTGCCTGGTGTGCAATGGAGGCTCAAGCAGCCC 80  
  
*GmPAP14Z* CTTCATTAGGAAAAGTTGAGAAGACAGTGGATATGCCACTTGACAGCGATGTCTTTGCTGTTCCCTCTGGTTATAATGCTC 160  
*GmPAP14N* CTTCATTAGGAAAAGTTGAGAAGACAGTGGATATGCCACTTGACAGCGATGTCTTTGCTGTTCCCTCTGGTTATAATGCTC 160  
  
*GmPAP14Z* CCCAGCAGGTTTCATATAACGCAAGGTGACCTTTGTGGGAAAGCAGTGATCGTGTTCATGGGTGACAGTGGATGAACCGGGG 240  
*GmPAP14N* CCCAGCAGGTTTCATATAACGCAAGGTGACCTTTGTGGGAAAGCAGTGATCGTGTTCATGGGTGACAGTGGATGAACCGGGG 240  
  
*GmPAP14Z* TCGAGCGAAGTGCATTACTGGAGTGAGAACAGTGACAAGAAGAAGATTGCCGAAGGAAAACCTGTTACTTATAGGTTCTT 320  
*GmPAP14N* TCGAGCGAAGTGCATTACTGGAGTGAGAACAGTGACAAGAAGAAGATTGCCGAAGGAAAACCTGTTACTTATAGGTTCTT 320  
  
*GmPAP14Z* CAATTACTCATCTGGGTTTATACACCACACCACCATCAGAAATTTGGAGTACAAAACCAAATACTACTATGAGGTTGGAC 400  
*GmPAP14N* CAATTACTCATCTGGGTTTATACACCACACCACCATCAGAAATTTGGAGTACAAAACCAAATACTACTATGAGGTTGGAC 400  
  
*GmPAP14Z* TTGGGAACACAACACGGCAATTTTGGTTTGTGACTCCTCCTGAAATTGGTCCTGATGTCCATACACATTTGGTCTCATA 480  
*GmPAP14N* TTGGGAACACAACACGGCAATTTTGGTTTGTGACTCCTCCTGAAATTGGTCCTGATGTCCATACACATTTGGTCTCATA 480  
  
*GmPAP14Z* GGGGATCTTGGTCAGAGTTTGTATTCAAATAAAGACTCTTCTCACTATGAATTGAACCAAGAAAAGGACAAACTGTACT 560  
*GmPAP14N* GGGGATCTTGGTCAGAGTTTGTATTCAAATAAAGACTCTTCTCACTATGAATTGAACCAAGAAAAGGACAAACTGTACT 560  
  
*GmPAP14Z* GTTGTGGAGACCTCTCTTATGCGGATAACTACCCAAATCATGATAAAGTTAGGTGGGATCTTGGGGAAGGTTTACAG 640  
*GmPAP14N* GTTGTGGAGACCTCTCTTATGCGGATAACTACCCAAATCATGATAAAGTTAGGTGGGATCTTGGGGAAGGTTTACAG 640  
  
*GmPAP14Z* AAAGGAGTGTGTCTTATCAACCATGGATATGGACTGCAGGAAACCATGAAATTGATTTTGCCTCCAGAAATTGGTGAAACC 720  
*GmPAP14N* AAAGGAGTGTGTCTTATCAACCATGGATATGGACTGCAGGAAACCATGAAATTGATTTTGCCTCCAGAAATTGGTGAAACC 720  
  
*GmPAP14Z* GTACCTTTCAAACCTTATACCCACCGTTACCATGTTCTCTATAAAGCATCTCAAAGTACTTCACCCCTTCTGGTATTCTAT 800  
*GmPAP14N* GTACCTTTCAAACCTTATACCCACCGTTACCATGTTCTCTATAAAGCATCTCAAAGTACTTCACCCCTTCTGGTATTCTAT 800  
  
*GmPAP14Z* CAAGAGAGCTTCAGCACACATCATTGTTTTGGCCTCATATTTCAGCCTATGGAAAAATATACACCACAATATAAATGGCTTG 880  
*GmPAP14N* CAAGAGAGCTTCAGCACACATCATTGTTTTGGCCTCATATTTCAGCCTATGGAAAAATATACACCACAATATAAATGGCTTG 880  
  
*GmPAP14Z* AAGAGGAGCTACCGAAAGTTAACAGGACAGAGACTCCTTGGTTGATTGTTCTCATGCATTACCTTGGTATAATAGCTAC 960  
*GmPAP14N* AAGAGGAGCTACCGAAAGTTAACAGGACAGAGACTCCTTGGTTGATTGTTCTCATGCATTACCTTGGTATAATAGCTAC 960  
  
*GmPAP14Z* AATTATCACTATATGGAAGGGGAAACAATGAGAGTAAATGTATGAGCCCTGGTTTGTGCAGTACAAGGTTGATGTTGTTT 1040  
*GmPAP14N* AATTATCACTATATGGAAGGGGAAACAATGAGAGTAAATGTATGAGCCCTGGTTTGTGCAGTACAAGGTTGATGTTGTTT 1040  
  
*GmPAP14Z* TGCTGGTCATGTTTCATGCCTATGAACGATCTGAGCGTGTTCCTCAATGTTGCATACAATATTGTAATGGTCTTTGTGCTC 1120  
*GmPAP14N* TGCTGGTCATGTTTCATGCCTATGAACGATCTGAGCGTGTTCCTCAATGTTGCATACAATATTGTAATGGTCTTTGTGCTC 1120  
  
*GmPAP14Z* CTGTAAAGATCAATCAGCTCCTGTATATATAACCATTTGGTGATGGAGGAAACCTTGAAGGTTTAGCAACCAACATGACA 1200  
*GmPAP14N* CTGTAAAGATCAATCAGCTCCTGTATATATAACCATTTGGTGATGGAGGAAACCTTGAAGGTTTAGCAACCAACATGACA 1200  
  
*GmPAP14Z* GAACCACAGCCAAGTATTCTTCATTCCGAGAGGCCAGCTTTGGACATGCCATTTTGGACATAACGAACCGAACTCATGC 1280  
*GmPAP14N* GAACCACAGCCAAGTATTCTTCATTCCGAGAGGCCAGCTTTGGACATGCCATTTTGGACATAACGAACCGAACTCATGC 1280  
  
*GmPAP14Z* TCACTAAGCTGGCACCAGAAATCAAGAGGAGTTGCTTTGAGGCTGATTCCGTTGGTTTTTCAACAGATACTGGCACC 1360  
*GmPAP14N* TCACTAAGCTGGCACCAGAAATCAAGAGGAGTTGCTTTGAGGCTGATTCCGTTGGTTTTTCAACAGATACTGGCACC 1360  
  
*GmPAP14Z* CAGTTGATGATTCCACGGCTCATGTTTCACATTAA 1395  
*GmPAP14N* CAGTTGATGATTCCACGGCTCATGTTTCACATTAA 1395

Figure S3 : Sequence alignment of *GmPAP14Z* and *GmPAP14N*.
